# Supplementary material
Source: publisher figshare collection journal article supplement (https://acs.figshare.com/ndownloader/files/3848242)
Supplement: Supplementary file 1 [file 3848242]

# Interplay of Substrate Surface Energy and Nanoparticle Concentration in Suppressing Polymer Thin Film Dewetting

Sudeshna Roy,<sup>1,2</sup> Diya Bandyopadhyay,<sup>2</sup> Alamgir Karim,<sup>2,3\*</sup> and Rabibrata Mukherjee<sup>1\*</sup>

<sup>1</sup>Department of Chemical Engineering, IIT Kharagpur, 721302, India

<sup>2</sup>Department of Polymer Engineering, University of Akron, OH 44325, USA

<sup>3</sup>Akron Functional Materials Centre (AFMC), University of Akron, OH 44325, USA

## Online Supporting Information

### 1.0 Measurement of Substrate Surface Energy and Calculation of Interfacial Energies between Different Components

Contact angle (CA) measurement shows that the substrate surface energy ( $\gamma_s$ ) varies with progressive UVO exposure. The magnitude of  $\gamma_s$  after different durations of UVO is calculated using the Young Dupre Equation (E-1), given below.

$$\gamma_L(\cos\theta + 1) = 2 \left[ \sqrt{\gamma_s^{LW} \gamma_L^{LW}} + \sqrt{\gamma_s^+ \gamma_L^-} + \sqrt{\gamma_s^- \gamma_L^+} \right] \quad (\text{E1}) \quad (\text{Equation 41 of Reference No. 1})$$

The unknowns are  $\gamma_s^{LW}$ ,  $\gamma_s^+$  and  $\gamma_s^-$ . In order to evaluate these three unknowns, three probing liquids are necessary, which were Water, Ethylene Glycol and Toluene. The surface tension components of the probing liquids as well as that of PS and C<sub>60</sub> are given in Table S1.<sup>2,3</sup> Further, the interfacial energy between the substrate and PS ( $\gamma_{s-PS}$ ), the substrate and the particles ( $\gamma_{s-C60}$ ) and the particles and PS ( $\gamma_{C60-PS}$ ) are calculated using the Equation E2:

$$\gamma_{12} = \gamma_{12}^{LW} + \gamma_{12}^P \quad (\text{E2})$$

Where,  $\gamma_{12}^{LW}$  is the van der Waal's component of interfacial energy and  $\gamma_{12}^P$  is the Polar component of interfacial energy. The two components can be determined using the following equations:

$$\gamma_{12}^{LW} = \left( \sqrt{\gamma_1^{LW}} - \sqrt{\gamma_2^{LW}} \right)^2 \quad (\text{E3A})$$

$$\gamma_{12}^P = 2(\sqrt{\gamma_1^+ \gamma_1^-} + \sqrt{\gamma_2^+ \gamma_2^-} - \sqrt{\gamma_1^+ \gamma_2^-} - \sqrt{\gamma_1^- \gamma_2^+}) \quad (\text{E3B})$$

$$\text{Also, } \gamma_1^P = 2(\sqrt{\gamma_1^+ \gamma_1^-}) \quad (\text{E3C})$$

Combining equation E2 with equations E3A and E3B, one obtains

$$\gamma_{12} = \gamma_1 + \gamma_2 - 2 \left( \sqrt{\gamma_1^{LW} \gamma_2^{LW}} + \sqrt{\gamma_1^+ \gamma_2^-} + \sqrt{\gamma_1^- \gamma_2^+} \right) \quad (\text{E4}) \quad (\text{Equation 43b of Reference No. 1})$$

**Table S1: Surface Tension components of the Probing Liquids used as well as PS and Fullerene (in mJ/m<sup>2</sup>)**

| Name            | Molecular Formula                             | Surface Tension (mJ/m <sup>2</sup> ) @ 20°C |                              |                      |                     |                     |
|-----------------|-----------------------------------------------|---------------------------------------------|------------------------------|----------------------|---------------------|---------------------|
|                 |                                               | Total ( $\gamma$ )                          | Dispersive ( $\gamma^{LW}$ ) | Polar ( $\gamma^P$ ) | Acid ( $\gamma^+$ ) | Base ( $\gamma^-$ ) |
| Water           | H <sub>2</sub> O                              | 72.8                                        | 21.8                         | 51                   | 25.5                | 25.5                |
| Ethylene Glycol | C <sub>2</sub> H <sub>6</sub> O <sub>2</sub>  | 48                                          | 29                           | 19                   | 1.92/3              | 47/30.1             |
| Toluene         | C <sub>7</sub> H <sub>8</sub>                 | 27.9                                        | 25.6                         | 2.3                  | 1.0                 | 2.3                 |
| Polystyrene     | (C <sub>8</sub> H <sub>8</sub> ) <sub>n</sub> | 42.1                                        | 42.1                         | 0                    | 0                   | 1.1                 |
| Fullerene       | C <sub>60</sub>                               | 41.7                                        | 36.8                         | 4.85                 | 1                   | 5.91                |

The variation of  $\gamma_s$  as a function of UVO exposure time ( $t_E$ ) is shown in graphically shown in Figure S1. The measured values of contact angles with the three probing liquids on substrates exposed for different durations of UVO as well as the calculated values of  $\gamma_s^{LW}$ ,  $\gamma_s^+$ ,  $\gamma_s^-$  are listed in Table S2. The values of the interfacial tension between the different components are also listed there.

**Table S2: Measured Contact Angle on substrates with different probing liquids, calculated substrate Surface Energy  $\gamma_s$  along with its components and Interfacial Energies  $\gamma_{s-C60}$  and  $\gamma_{s-PS}$  as a function of  $t_E$ .**

| $t_E$<br>(min) | Measured Contact Angle (°) |                     |                       | Calculated Surface Energy (Components/ Total) in mJ/m <sup>2</sup> |              |              |              |            |                  |                 |
|----------------|----------------------------|---------------------|-----------------------|--------------------------------------------------------------------|--------------|--------------|--------------|------------|------------------|-----------------|
|                | Water<br>$\theta_W$        | EG<br>$\theta_{EG}$ | Toluene<br>$\theta_T$ | $\gamma_s^{LW}$                                                    | $\gamma_s^+$ | $\gamma_s^-$ | $\gamma_s^P$ | $\gamma_s$ | $\gamma_{s-C60}$ | $\gamma_{s-PS}$ |
| 0              | 85.8                       | 62.3                | 3.0                   | 24.61                                                              | 0.52         | 5.87         | 3.47         | 28.08      | 1.287            | 5.962           |
| 2              | 74.7                       | 48.5                | 3.0                   | 20.42                                                              | 2.56         | 11.02        | 10.62        | 31.05      | 3.524            | 14.557          |
| 4              | 56.4                       | 37.2                | 3.0                   | 15.61                                                              | 4.33         | 29.84        | 22.74        | 38.35      | 11.069           | 29.179          |
| 6              | 49.8                       | 31.2                | 3.0                   | 14.15                                                              | 5.35         | 36.83        | 28.09        | 42.31      | 14.909           | 35.525          |
| 8              | 41.2                       | 26.3                | 3.0                   | 12.66                                                              | 6.03         | 47.43        | 33.82        | 46.53      | 19.278           | 42.375          |
| 10             | 32.5                       | 19.8                | 3.0                   | 11.41                                                              | 6.83         | 56.99        | 39.47        | 50.88      | 23.786           | 49.146          |
| 12             | 27.3                       | 17.4                | 3.0                   | 10.86                                                              | 7.04         | 62.58        | 42.02        | 52.87      | 25.846           | 52.193          |
| 15             | 24.3                       | 14.3                | 3.0                   | 10.55                                                              | 7.35         | 65.01        | 43.73        | 54.28      | 27.260           | 54.203          |
| 17             | 18.6                       | 10.2                | 2.0                   | 10.10                                                              | 7.62         | 69.75        | 46.13        | 56.23      | 29.178           | 56.996          |
| 20             | 3.0                        | 3.0                 | 2.0                   | 9.53                                                               | 7.85         | 76.54        | 49.05        | 58.50      | 31.697           | 60.618          |
| 30             | 3.0                        | 3.0                 | 2.0                   | 9.53                                                               | 7.85         | 76.54        | 49.05        | 58.50      | 31.697           | 60.618          |

$$\gamma_{C60-PS} = 5.078 \text{ mJ/m}^2$$

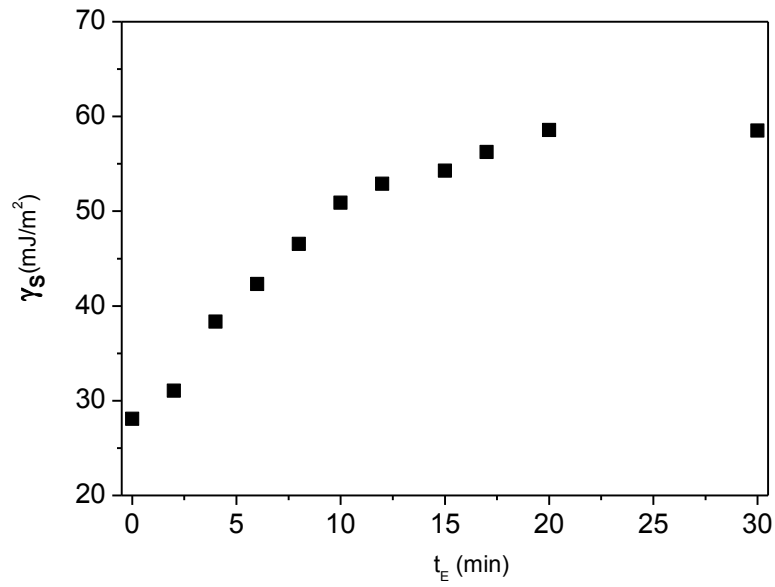

**Figure S1:** Plot of Surface Energy of the substrate vs. UVO exposure time ( $t_E$ ).

#### Free Energy of Adhesion ( $\Delta G_{C60-PS-S}$ )

Based on the above data we calculated the Free Energy of Adhesion ( $\Delta G_{C60-PS-S}$ ), which indicates the change in free energy when C60 (particles) and the substrate comes in contact with each other by displacing a layer of PS between them. This can be calculated as per the following formulae:  $\Delta G_{C60-PS-S} = \gamma_{S-C60} - (\gamma_{S-PS} + \gamma_{C60-PS})$  (E5)

A negative value of  $\Delta G_{C60-PS-S}$  indicates attachment of the particles and the substrate and lower is the value; more favored will be the adhesion. Table S3 gives the value of  $\Delta G_{C60-PS-S}$  as a function of  $\gamma_s$

| $\gamma_s$ (mJ/m <sup>2</sup> ) | $\Delta G_{C60-PS-S}$ (mJ/m <sup>2</sup> ) |
|---------------------------------|--------------------------------------------|
| 28.08                           | - 2.171                                    |
| 31.05                           | -13.003                                    |
| 38.35                           | - 35.170                                   |
| 42.31                           | - 45.356                                   |
| 46.53                           | - 56.575                                   |
| 50.88                           | - 67.854                                   |
| 52.87                           | -72.961                                    |
| 54.28                           | - 76.385                                   |
| 56.23                           | - 81.096                                   |
| 58.50                           | - 87.237                                   |

## 2.0 Morphology of as Cast Films (Particle Free as well as Particle Containing)

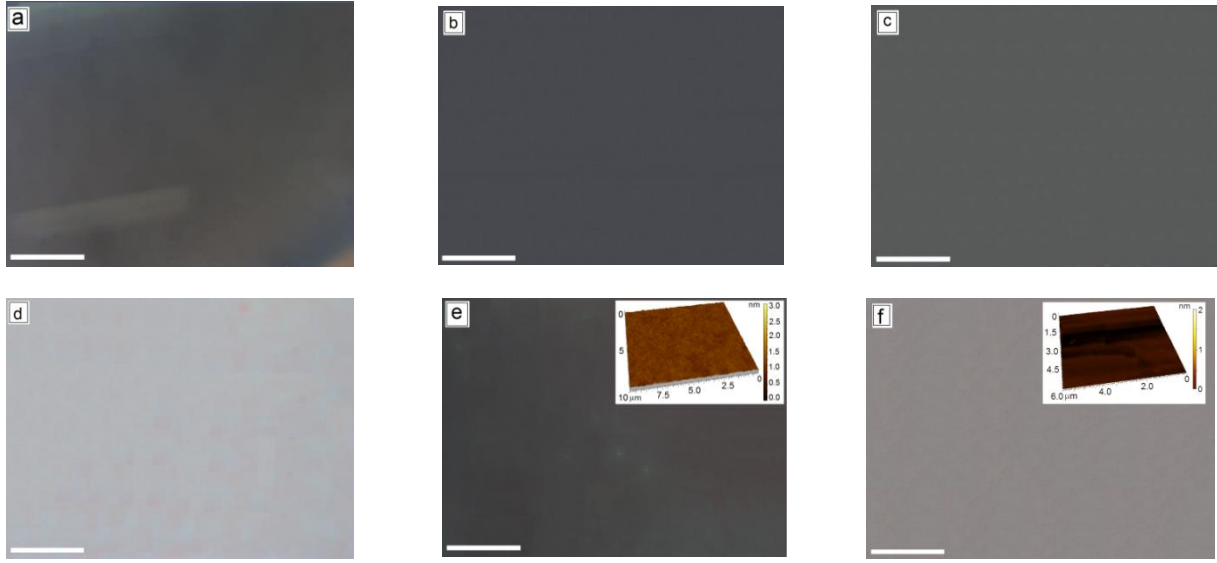

**Figure S2:** Optical Microscope images of as cast films prior to annealing. (a) particle free on a substrate with  $\gamma_s = 28.04 \text{ mJ/m}^2$ ; (b)  $C_{NP} = 0.1\%$  on a substrate with  $\gamma_s = 28.04 \text{ mJ/m}^2$ ; (c)  $C_{NP} = 0.1 \%$  on a substrate with  $\gamma_s = 58.50 \text{ mJ/m}^2$ ; (d)  $C_{NP} = 0.625 \%$  on a substrate with  $\gamma_s = 58.50 \text{ mJ/m}^2$ . (e)  $C_{NP} = 1.0 \%$  on a substrate having  $\gamma_s = 28.04 \text{ mJ/m}^2$ ; (f)  $C_{NP} = 1.0 \%$  on a substrate having  $\gamma_s = 58.50 \text{ mJ/m}^2$ . Scale bar is  $100 \mu\text{m}$  in all the cases. Inset to frames e and f shows the AFM scan of the film surface, and the very low surface roughness.

### Interfacial Morphology of the as Cast Films after Peeling the Film

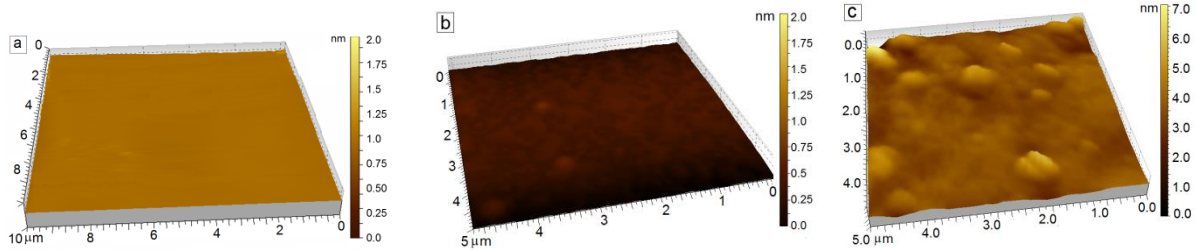

**Figure S3:** Morphology of the film – substrate interface of the as cast films. (a) Particle free film on a substrate with  $\gamma_s = 58.50 \text{ mJ/m}^2$ , (b) film with  $C_{NP} = 0.5\%$  on a substrate with  $\gamma_s = 58.50 \text{ mJ/m}^2$ , and (c) film with  $C_{NP} = 2.0 \%$  on a substrate with  $\gamma_s = 58.50 \text{ mJ/m}^2$ .

### 3.0 Morphology of Dewetted Films

#### Morphology of Dewetted Films with no particles ( $C_{NP} = 0.0\%$ ) (Control Experiment)

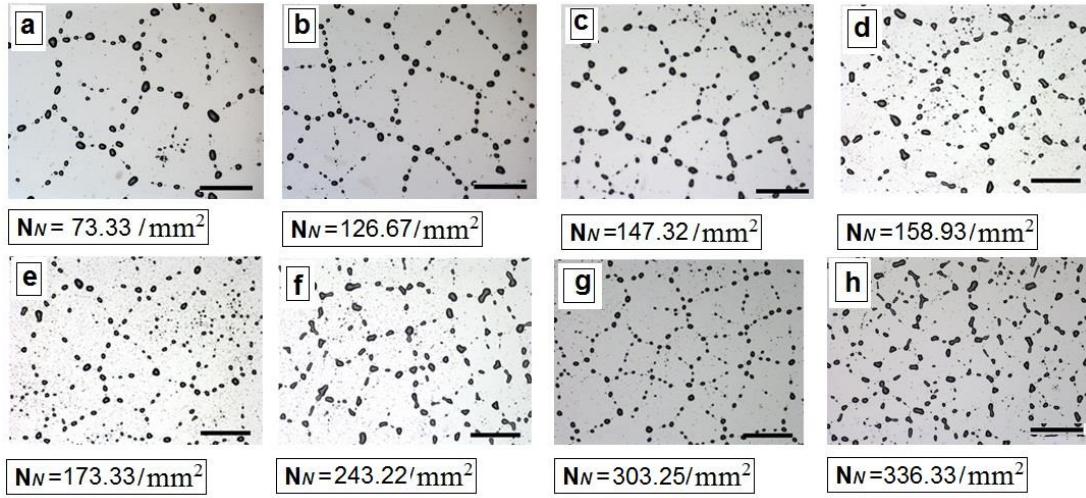

**Figure S4:** Optical Microscopy images of completely dewetted 112 nm thick particle free films, annealed for 46 hours at 130°C. The surface energy of the substrate is: (a) 28.04, (b) 31.05, (c) 38.35, (d) 42.31, (e) 46.53, (f) 50.88, (g) 54.28, and (h) 58.50 mJ/m<sup>2</sup>. Scale bar = 100  $\mu$ m.

#### 3.1 Morphology of Fully Dewetted Particle Containing Films (Regime 1)

##### $C_{NP} = 0.1\%$ (Regime 1, Complete Dewetting)

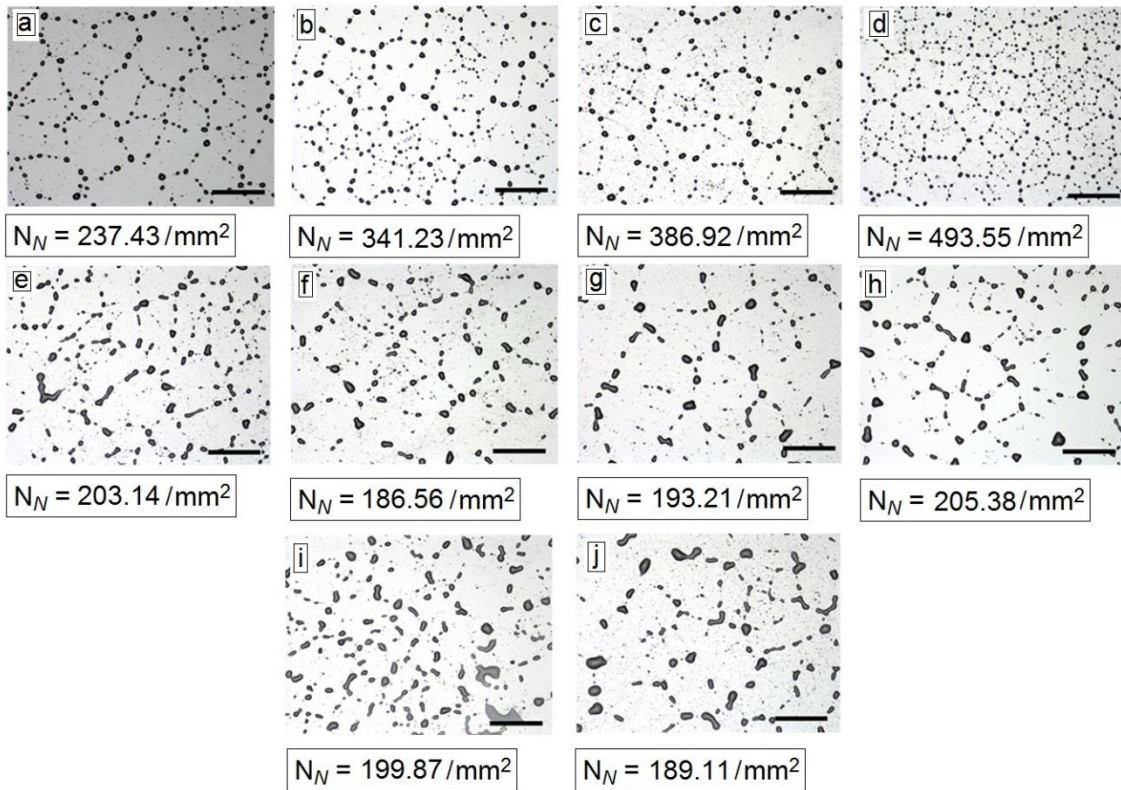

**Figure S5:** Optical Microscopy images of completely dewetted 112 nm thick films with  $C_{NP} = 0.1\%$ , annealed for 46 hours at 130°C. The surface energy (mJ/m<sup>2</sup>) of the substrate is: (a) 28.08, (b) 31.05, (c) 38.35, (d) 42.31, (e) 46.53, (f) 50.88, (g) 52.87, (h) 54.28, (i) 56.23 and (j) 58.50. Scale bar = 100  $\mu$ m.



$C_{NP} = 0.2\%$  (Regime 1, Complete Dewetting)

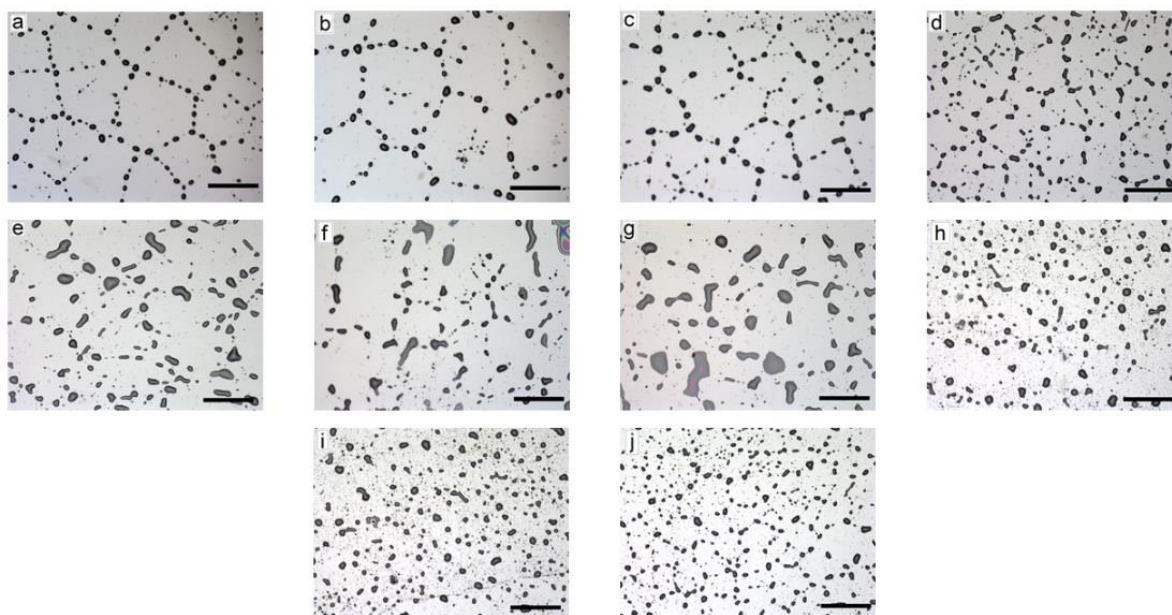

**Figure S6:** Optical Microscopy images of completely dewetted 112 nm thick films with  $C_{NP} = 0.2\%$ , annealed for 46 hours at 130°C. The surface energy ( $\text{mJ/m}^2$ ) of the substrate is: (a) 28.08, (b) 31.05, (c) 38.35, (d) 42.31, (e) 46.53, (f) 50.88, (g) 52.87, (h) 54.28, (i) 56.23 and (j) 58.50. Scale bar = 100  $\mu\text{m}$ .

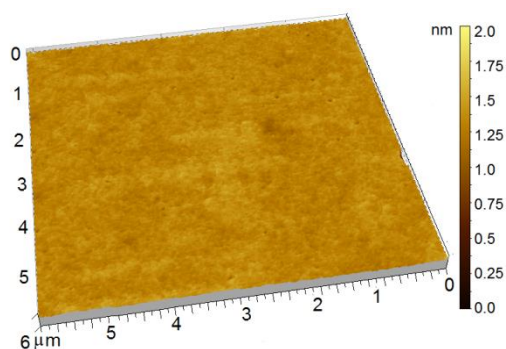

**Figure S7:** Particle free smooth substrate – film interface after 46 hours of annealing, in a film with  $C_{NP} = 0.1\%$  on a substrate with  $\gamma_s = 31.05 \text{ mJ/m}^2$ .

### 3.2 Morphology of Partially Dewetted Particle Containing Films (Regime 2)

$C_{NP} = 0.3 \%$  (Regime2, Partial Dewetting)

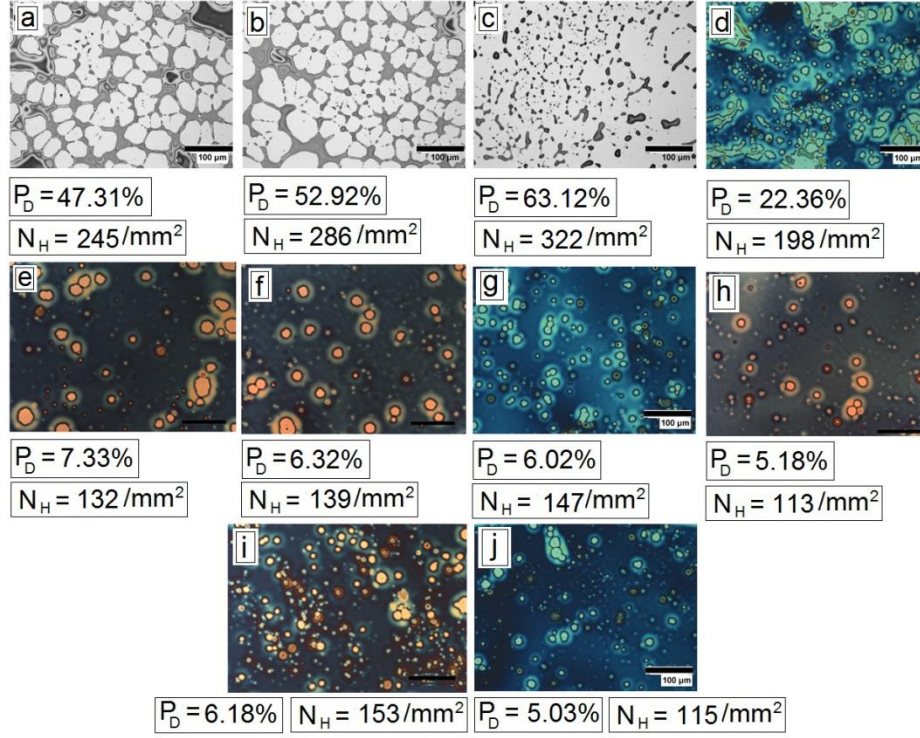

**Figure S8:** Optical Microscopy images of partially dewetted 112 nm thick films with  $C_{NP} = 0.3 \%$ , annealed for 46 hours at 130°C. The surface energy (mJ/m<sup>2</sup>) of the substrate is: (a) 28.08, (b) 31.05, (c) 38.35, (d) 42.31, (e) 46.53, (f) 50.88, (g) 52.87, (h) 54.28, (i) 56.23 and (j) 58.50. Scale bar = 100  $\mu$ m.

$C_{NP} = 0.5 \%$  (Regime2, Partial Dewetting)

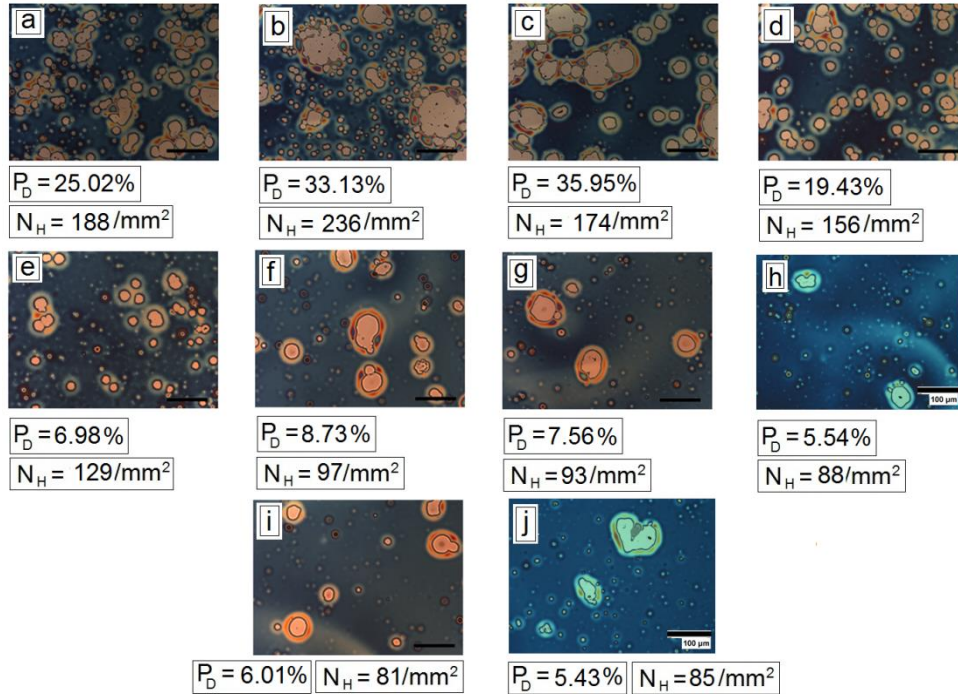

**Figure S9:** Optical Microscopy images of partially dewetted 112 nm thick films with  $C_{NP} = 0.5 \%$ , annealed for 46 hours at 130°C. The surface energy (mJ/m<sup>2</sup>) of the substrate is: (a) 28.08, (b) 31.05, (c) 38.35, (d) 42.31, (e) 46.53, (f) 50.88, (g) 52.87, (h) 54.28, (i) 56.23 and (j) 58.50. Scale bar = 100  $\mu$ m.



**$C_{NP} = 0.625 \%$  (Regime2, Partial Dewetting)**

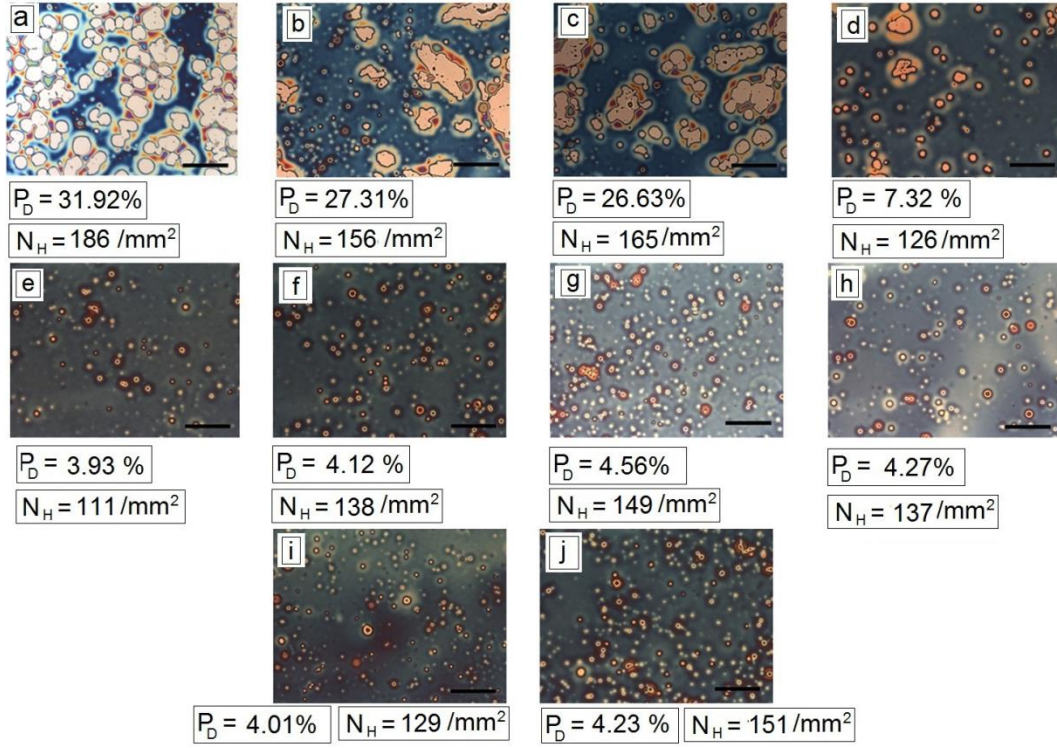

**Figure S10:** Optical Microscopy images of partially dewetted 112 nm thick films with  $C_{NP} = 0.625 \%$  annealed for 46 hours at 130°C. The surface energy (mJ/m<sup>2</sup>) of the substrate is: (a) 28.08, (b) 31.05, (c) 38.35, (d) 42.31, (e) 46.53, (f) 50.88, (g) 52.87, (h) 54.28, (i) 56.23 and (j) 58.50. Scale bar = 100  $\mu$ m. The % of dewetting ( $P_D$ ) and the Number density of holes ( $N_H$ ) are marked in each frame.

**$C_{NP} = 0.75 \%$  (Regime2, Partial Dewetting)**

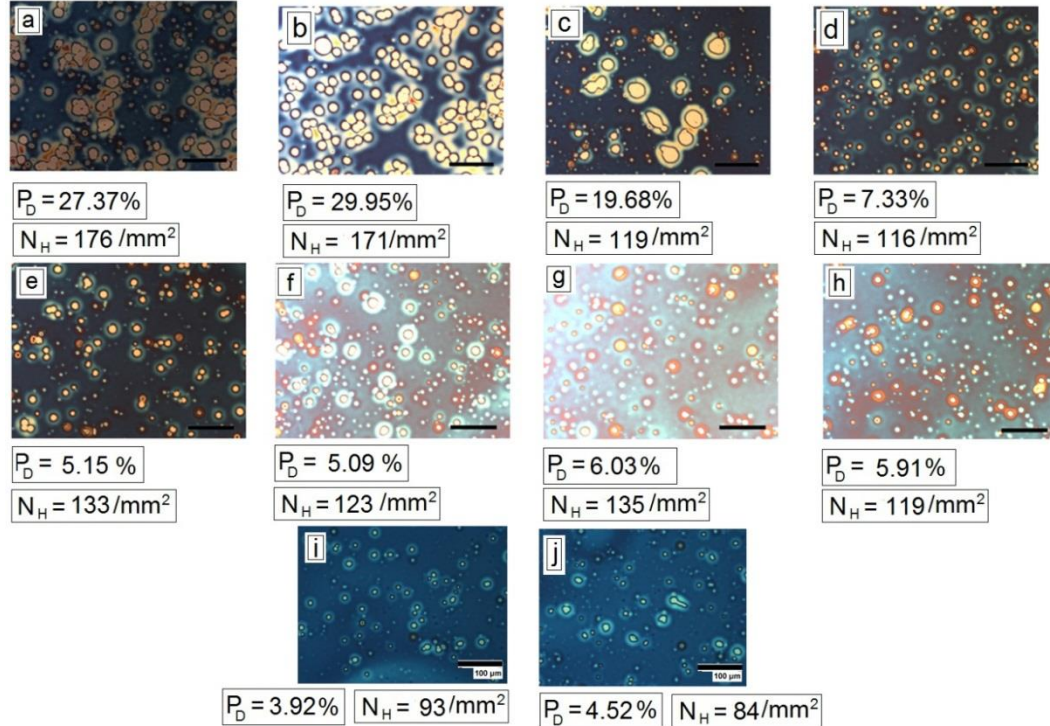

**Figure S11:** Optical Microscopy images of partially dewetted 112 nm thick films with  $C_{NP} = 0.75 \%$  annealed for 46 hours at 130°C. The surface energy (mJ/m<sup>2</sup>) of the substrate is: (a) 28.08, (b) 31.05, (c) 38.35, (d) 42.31, (e) 46.53, (f) 50.88, (g) 52.87, (h) 54.28, (i) 56.23 and (j) 58.50. Scale bar = 100  $\mu$ m.



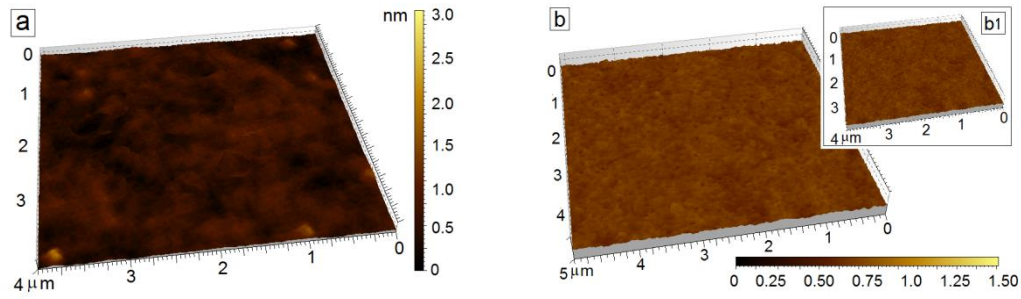

**Figure S12:** Morphology of the substrate – film interface after 46 hours of annealing, in a film with  $C_{NP} = 0.625\%$ . (a) The interface is smooth and free from any particle cluster on a substrate with  $\gamma_s = 28.08 \text{ mJ/m}^2$  and (b)  $38.35 \text{ mJ/m}^2$ .

### 3.3 Morphology of Completely stable Particle Containing Films (Regime 3) $C_{NP} = 1.0\%$ (Regime 3, Complete Suppression of Dewetting)

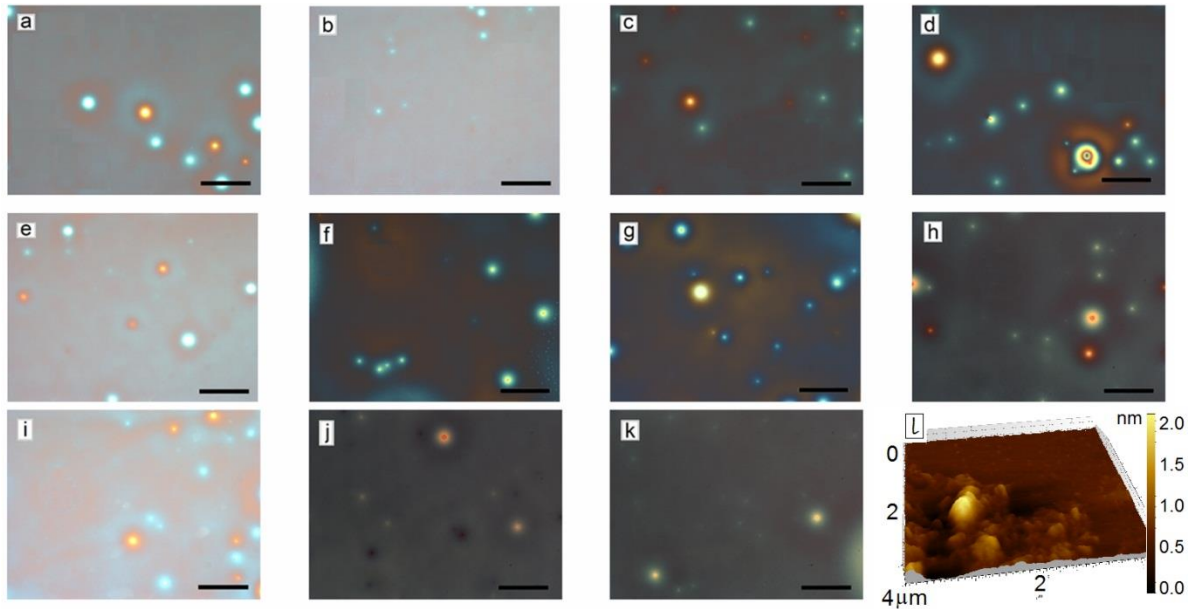

**Figure S13:** Optical Microscopy images of 112 nm thick films with  $C_{NP} = 1.0\%$ , annealed for 46 hours at  $130^\circ\text{C}$ , with no sign of dewetting. The surface energy ( $\text{mJ/m}^2$ ) of the substrate is: (a) 28.08, (b) 31.05, (c) 38.35, (d) 42.31, (e) 46.53, (f) 50.88, (g) 52.87, (h) 54.28, (i) 56.23, (j) 58.50 and (k) 58.50. Scale bar =  $100 \mu\text{m}$ . (l) Typical AFM morphology of the tiny clusters formed on the film surface.

$C_{NP} = 2.0\%$  (Regime 3, Complete Suppression of Dewetting)

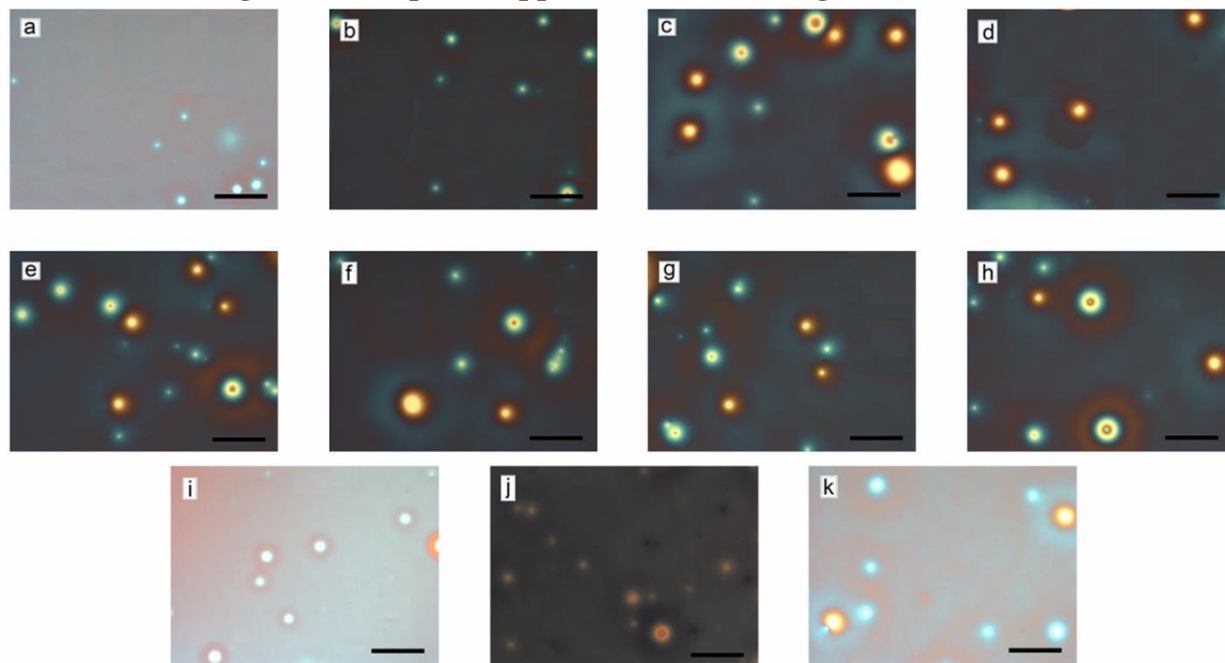

**Figure S14:** Optical Microscopy images of 112 nm thick films with  $C_{NP} = 2.0\%$ , annealed for 46 hours at  $130^{\circ}\text{C}$ , with no sign of dewetting. The surface energy ( $\text{mJ}/\text{m}^2$ ) of the substrate is: (a) 28.08, (b) 31.05, (c) 38.35, (d) 42.31, (e) 46.53, (f) 50.88, (g) 52.87, (h) 54.28, (i) 56.23, (j) 58.50 and (k) 58.50. Scale bar =  $100\ \mu\text{m}$ . The white spots are particle clusters formed during spin coating itself, which can be seen in inset to figure 1c.

#### 4.0 Calculation of $\chi_{PS-C_{60}}$ :

Compiled values of PS and C<sub>60</sub> solubility parameter:

$\delta_{PS}$  :

1. 17.9±0.2 MPa<sup>1/2</sup> (Ref 4)
2. 18.6 MPa<sup>1/2</sup> (Ref 5,6)
3. 17.5-19.1 MPa<sup>1/2</sup> (Ref 7)
4. 9.1 (cal/cm<sup>3</sup>)<sup>1/2</sup> (Ref 8 – 10)  $\approx$  18.6 MPa<sup>1/2</sup>
5. 7.6±0.2 (cal/cm<sup>3</sup>)<sup>1/2</sup> at 193 °C (Ref 11)
6. 18.5 MPa<sup>1/2</sup> (Ref 12)

$\delta_{C_{60}}$  :

1. 20.09 MPa<sup>1/2</sup> (Ref 13,14)
2. 18.5 MPa<sup>1/2</sup> (Ref 15)
3. 9.8 (cal/cm<sup>3</sup>)<sup>1/2</sup> (Ref 16)

#### 4.1 Calculated chi value:

| Sl. No. | $\delta_{PS}$ | $\delta_{C_{60}}$ | $\chi_{PS-C_{60}}$ |
|---------|---------------|-------------------|--------------------|
| 1.      | 18.1          | 20.09             | 0.1745             |
| 2.      | 18.1          | 18.5              | 0.007              |
| 3.      | 18.1          | 20.046            | 0.167              |
| 4.      | 17.7          | 20.09             | 0.252              |
| 5.      | 17.7          | 18.5              | 0.028              |
| 6.      | 17.7          | 20.046            | 0.242              |
| 7.      | 18.6          | 20.09             | 0.0984             |
| 8.      | 18.6          | 18.5              | 0.00044            |
| 9.      | 18.6          | 20.046            | 0.092              |
| 10.     | 17.5          | 20.09             | 0.2955             |
| 11.     | 17.5          | 18.5              | 0.044              |
| 12.     | 17.5          | 20.046            | 0.2856             |
| 13.     | 19.1          | 20.09             | 0.043              |
| 14.     | 19.1          | 18.5              | 0.016              |
| 15.     | 19.1          | 20.046            | 0.039              |
| 16.     | 18.5          | 20.09             | 0.1114             |
| 17.     | 18.5          | 18.5              | 0                  |
| 18.     | 18.5          | 20.046            | 0.1053             |
| 19.     | 15.955        | 20.09             | 0.441 (at 193 °C)  |
| 20.     | 15.955        | 18.5              | 0.167 (at 193 °C)  |
| 21.     | 15.955        | 20.046            | 0.432 (at 193 °C)  |
| 22.     | 15.136        | 20.09             | 0.633 (at 193 °C)  |
| 23.     | 15.136        | 18.5              | 0.292 (at 193 °C)  |
| 24.     | 15.136        | 20.046            | 0.622 (at 193 °C)  |

## 4.2 Sample Calculation of $\chi_{PS-C_{60}}$ :

It is calculated using regular solution theory as described by Emerson *et al.*<sup>4</sup>

$$\chi_{PS-C_{60}} = \frac{V_0}{RT} (\delta_{PS} - \delta_{C_{60}})^2$$

$\chi_{PS-C_{60}}$  is the polymer-polymer interaction parameter

$V_0$  is the geometric mean of polymer segment molar volumes (for simplicity of calculation it is taken as 100 cm<sup>3</sup>/mol)

$R$  is the gas constant ( $R = 8.314$  J/mol.K)

$T$  is the temperature in temperature in K ( $T = 273$  K)

$\delta_{PS}$  and  $\delta_{C_{60}}$  are the solubility parameter of PS and C<sub>60</sub> respectively.<sup>5,6</sup>

$$\delta_{PS} = 18.6 \text{ MPa}^{1/2}$$

$$\delta_{C_{60}} = 20.09 \text{ MPa}^{1/2}$$

Calculated interaction parameter of PS-C<sub>60</sub>:  $\chi_{PS-C_{60}} = 0.0984$

## References:

1. Van Oss, C. J.; Chaudhury, M. K.; Good, R. J. *Chem. Rev.* **1988**, 88, 927-941
2. Cwikel, D.; Zhao, Q.; Liu, C.; Su, X.; Marmur, A. *Langmuir* **2010**, 26, 15289-15294.
3. Ma, X.; Wigington, B.; Bouchard, D. *Langmuir* **2010**, 26, 11886-11893.
4. Emerson, J. A.; Toolan, D. T. W.; Howse, J. R.; Furst, E. M.; Epps, T. H. *Macromolecules* **2013**, 46, 6533–6540.
5. Gong, Y.; Huang, H.; Hu, Z.; Chen, Y.; Chen, D.; Wang, Z.; He, T. *Macromolecules* **2006**, 39, 3369–3376.
6. Jang, B. N.; Wang, D.; Wilkie, C. A. *Macromolecules* **2005**, 38, 6533–6543.
7. Price, A. D.; Hur, S.; Fredrickson, G. H.; Frischknecht, A. L.; Huber, D. L. *Macromolecules* **2012**, 45, 510–524.
8. Dekeyser, C. M.; Biltresse, S.; Marchand-brynaert, J.; Rouxhet, P. G.; Dupont-gillain, C. C. *Polymer* **2004**, 45, 2211–2219.
9. Blanks, R. F.; Prausnitz, J. M. *IEC Fundamentals* **1964**, 2, 1–8.
10. Weng, H.; Huang, X.; Wang, M.; Ji, X.; Ge, X. *Langmuir* **2013**, 29, 15367–15374.
11. Guillet, E.; September, R. *Macromolecules* **1978**, 1, 228–235.



12. Gotrik, K. W.; Hannon, A. F.; Son, J. G.; Keller, B.; Alexander-Katz, A.; Ross, C. A. *ACS Nano* **2012**, *6*, 8052–8059.
13. Huang, J. *Fluid Phase Equilib* **2005**, *237*, 186–192.
14. Hansen, C. M.; Smith, A. L. *Carbon* **2004**, *42*, 1591–1597.
15. Solvents, O. *J. Org. Chem* **1992**, *8*, 6077–6079.
16. Ruoff, R. S.; Tse, D. S.; Malhotra, R.; Lorents, D. C. *J. Phys. Chem.* **1993**, *97*, 3379–3383.
